# Supplementary material for: Optimal classification scores based on multivariate marker transformations
Source: Springer Nature journal article supplement (doi:10.1007/s10182-020-00388-z), 2021-01-03
Supplement: MOESM1 [file 10182_2020_388_MOESM1_ESM.r]

###### Function optimalT ######

optimalT <- function(X, D, H.method = c("Hbcv","Hscv","Hpi","Hns","Hlscv","Hbcv.diag","Hscv.diag","Hpi.diag","Hlscv.diag"), K = 1, add.densityContour = TRUE, removeNA = FALSE, X1.lim = NULL, X2.lim = NULL, levels.method = c("fpr","pretty"), figures = c("A","B","C"), new.window = TRUE, seed = 623){
  
  # X: marker data (n x 2 matrix)
  # D: response (vector of length n)
  # H.method: method for computing the bandwidth among those proposed by Duong (2007) ("Hbcv" by default, which is a biased cross validation estimate)
  # K: number of folds considered for cross-validation. If K = 1 (default), optimal transformation is estimated
  # add.densityContour: TRUE if density contours of the bivariate density estimates for both populations should be shown over the optimal transformation contour plot
  # removeNA: TRUE if the region displayed should be adjusted removing NA-values in the optimal transformation (f+g estimate is zero)
  # X1.lim, X2.lim: limits for the region displayed (vectors of length 2)
  # levels.method: "fpr" if the optimal transformation contour levels displayed correspond to the sequence 0:0.1:1 of false-positive rates for the transformation; "pretty" if the default by filled.contour should be considered
  # figures: vector containing "A", "B" and/or "C" indicating which plots should be displayed:
  	# "A": contour plot for the bivariate kernel density estimate for positive (red) and negative (blue) populations
  	# "B": contour plot for the optimal score estimate
  	# "C": ROC curve estimate
  # new.window: TRUE if new windows should be opened for each figure displayed
  # seed: seed used for grouping in K-fold CV
  
  H.method <- match.arg(H.method)
  levels.method <- match.arg(levels.method)
  
  ## Required libraries
  
    library(nsROC)
	library(ks)
  	library(lattice)
  	library(zoo)
  	library(RColorBrewer)

  ## Multivariate kernel density estimates for each group (f: positive, g: negative)
  
  X0 <- X[D==0,]; X1 <- X[D==1,]
  f <- kde(X1, H = do.call(H.method, list(X1)))
  g <- kde(X0, H = do.call(H.method, list(X0)))
  
  ## Grid created for the plots
  
  if(is.null(X1.lim)) X1.lim <- range(X[,1])
  if(is.null(X2.lim)) X2.lim <- range(X[,2])
  #grid.1 <- sort(unique(X[,1])); grid.2 <- sort(unique(X[,2]))
  #grid.1 <- grid.1[which(grid.1 >= X1.lim[1] & grid.1 <= X1.lim[2])]
  #grid.2 <- grid.2[which(grid.2 >= X2.lim[1] & grid.2 <= X2.lim[2])]
  grid.1 <- seq(X1.lim[1], X1.lim[2], length.out=500); grid.2 <- seq(X2.lim[1], X2.lim[2], length.out=500)
  grid <- expand.grid(grid.1, grid.2)
  f.matrix <- matrix(predict(f, x = grid), nrow = length(grid.1))
  g.matrix <- matrix(predict(g, x = grid), nrow = length(grid.1))
  
  ## Contour plot for the bivariate kernel density estimates for both groups

  levels.2ddensities <- quantile(c(f.matrix,g.matrix),probs=seq(0,1,0.2))

	if("A" %in% figures){
		if(new.window) dev.new(width = 5, height = 5)
  		contour(x = grid.1, y = grid.2, f.matrix, col = 'firebrick4', lwd = 2, levels = levels.2ddensities, drawlabels = FALSE)
  		contour(x = grid.1, y = grid.2, g.matrix, col = 'dodgerblue4', lwd = 2, levels = levels.2ddensities, drawlabels = FALSE, add = TRUE)
	}
  
  z <- f.matrix/(f.matrix + g.matrix)
  
  ## If removeNA is TRUE, the grid and region displayed are adjusted removing NA-values in the optimal transformation (f+g estimate is zero)
  
  if(removeNA){
    while(sum(is.na(z)) != 0){
      index.na <- which(is.na(z), arr.ind = TRUE)
      na.1 <- table(index.na[,1]); na.2 <- table(index.na[,2])
      Table.NA <- rbind(c(na.1,na.2),c(rep(1,length(na.1)),rep(2,length(na.2))))
      index.max.NA <- which.max(Table.NA[1,])
      value.max.NA <- as.numeric(names(index.max.NA))
      if(Table.NA[2,index.max.NA] == 1){
        grid.1 <- grid.1[-value.max.NA]
        z <- z[-value.max.NA,]
        f.matrix <- f.matrix[-value.max.NA,]; g.matrix <- g.matrix[-value.max.NA,]
      }else{
        grid.2 <- grid.2[-value.max.NA]
        z <- z[,-value.max.NA]
        f.matrix <- f.matrix[,-value.max.NA]; g.matrix <- g.matrix[,-value.max.NA]
      }
    }
    grid <- expand.grid(grid.1, grid.2)
  }
  
  ## Optimal transformation estimate as a function of x
  
  T <- function(x){
    f.x <- predict(f, x = x); g.x <- predict(g, x = x)
    f.x/(f.x + g.x)
  }
  roc <- gROC(T(X), D)	# ROC curve estimate for the optimal transformation over the sample
  roc$auc	# Area Under the ROC Curve (AUC)
  
  ## Contour plot for the optimal score estimate
  
	if("B" %in% figures){
		
  	  if(new.window) dev.new(height = 5, width = 6.25)

	  if(levels.method == "fpr"){ # If levels.method is "fpr", the contour levels displayed correspond to the sequence 0:0.1:1 of false-positive rates for the score
	    levels.z.fpr <- c(min(z,na.rm=TRUE), sapply(seq(0.9,0.1,-0.1),function(fpr){
	    	index.frp <- which.min(abs(roc$points.coordinates[,2]-fpr))
	    	roc$points.coordinates[index.frp,1]
	    	}), max(z[z!=Inf],na.rm=TRUE))
	    filled.contour(x = grid.1, y = grid.2, z, color.palette = colorRampPalette(c("dodgerblue4","thistle","firebrick4")), levels = levels.z.fpr)
	  }else{
	    filled.contour(x = grid.1, y = grid.2, z, color.palette = colorRampPalette(c("dodgerblue4","thistle","firebrick4")), nlevels = 9)
	  }
	  
	  # If add.densityContour is TRUE, density contours of the bivariate density estimates for both populations should be shown over the score contour plot
	  
	  if(add.densityContour){ 
	    mar.orig <- par("mar")
	    w <- (3 + mar.orig[2]) * par("csi") * 2.54
	    layout(matrix(c(2, 1), nc = 2), widths = c(1, lcm(w)))
	    contour(x = grid.1, y = grid.2, f.matrix, col = 'firebrick2', lwd = 2, levels = levels.2ddensities, drawlabels = FALSE, add = TRUE)
	    contour(x = grid.1, y = grid.2, g.matrix, col = 'dodgerblue2', lwd = 2, levels = levels.2ddensities, drawlabels = FALSE, add = TRUE)
	  }
  
    }
  
    ## ROC curve estimate plot

  	if("C" %in% figures){
	  if(new.window) dev.new(height = 4.5, width = 4)
	  plot(roc)
	  if(levels.method == "fpr"){
	    color.palette <- colorRampPalette(c("dodgerblue4","thistle","firebrick4"))(11)
	    points(seq(1,0,-0.1), rep(0,11), pch = 15, col = color.palette)
	  }
  	}
  
  results <- list(X = X, D = D, tX = T(X), auc = roc$auc, x.grid = grid.1, y.grid = grid.2, z.grid = z)
  
  ## If K > 1, a K-fold cross-validation is computed to control the potential overfitting 
  
  if(K > 1){
    
      set.seed(seed)
      sample.cv.k <- sample(1:K, nrow(X), replace = TRUE)
      T <- rep(0,nrow(X))
      bar <- txtProgressBar(min = 0, max = K, style = 3)
      for(k in 1:K){
        setTxtProgressBar(bar, k)
        index.cv.k <- which(sample.cv.k == k)
        Xk <- X[-index.cv.k,]; Dk <- D[-index.cv.k]
        f <- kde(Xk[Dk==1,], H = Hscv(Xk[Dk==1,]), eval.points = X[index.cv.k,])$estimate
        g <- kde(Xk[Dk==0,], H = Hscv(Xk[Dk==0,]), eval.points = X[index.cv.k,])$estimate
        T[index.cv.k] <- f/(f+g)
      }
      close(bar)

  results[["tX.CV"]] <- T; results[["auc.CV"]] <- gROC(T,D)$auc
  
  }
  
  return(results)
  
    ## Output parameters:
    	# X: marker data
  		# D: response
  		# tX: optimal transformation estimate (score) for X
  		# auc: Area Under the ROC Curve for the score
  		# x.grid, y.grid: grid used for each component of the bivariate marker
  		# z.grid: matrix containing the values of the score over the grid x.grid * y.grid
  		# tX.CV: if K>1, optimal transformation estimate (score) for X resulting from the k-fold cross validation performed
  		# auc.CV: Area Under the ROC Curve for the score tX.CV

}


###### Code for figures in Section 4: using the function optimalT ######


data <- read.csv("qsar_fish_toxicity.csv", sep = ";", header = FALSE)
str(data)
names(data) <- c("Information indices", "2D descriptors", "2D autocorrelations", "Atom-type counts CH", "Atom-type counts C", "Molecular properties", "LC50_96hours")
data$toxicity <- ifelse(data$LC50 > median(data$LC50), 1, 0)
table(data$toxicity)

X <- data[,1:2]; D <- data$toxicity


## ROC curves and AUCs for original data and 2-fold cross-validation

output <- optimalT(X, D, H.method = "Hbcv", K = 2, X1.lim = c(1,4.5), X2.lim = c(0,2))

AUCs <- c(output$auc, output$auc.CV)
AUCs

T.orig <- output$tX
T.cv <- output$tX.CV
roc.orig <- gROC(T.orig,D)
roc.cv <- gROC(T.cv,D)
dev.new(height=4.5, width=4)
plot(roc.orig)
lines(roc.cv$t, roc.cv$roc, col = 'gray', lwd = 2)
legend('bottomright', c(paste0("Original (AUC = ", round(roc.orig$auc,2),")"), paste0("2-fold CV (AUC = ", round(roc.cv$auc,2),")")), col = c('black','gray'), lwd = 2, bty = "n", cex = 0.75, inset = 0.04)


## Figure 2 right panel in the paper

pdf("Ctoxicity_mod.pdf", height = 6, width = 9.5)
par(mar=c(5,5,1,1))
filled.contour(output$z.grid, x = output$x.grid, y = output$y.grid, xlab = "Information indices", ylab = "2D descriptors", cex.axis = 3, cex.lab = 2, cex.axis = 10, col = colorRampPalette(c("dodgerblue4","white","firebrick4"))(10), nlevels = 10, plot.axes = {axis(1,cex.axis=1.5); axis(2,cex.axis=1.5)}, key.axes = axis(4, seq(0,1,0.1), cex.axis=1.5))
dev.off()

pdf("3Dtoxicity_mod.pdf")
trellis.par.set("axis.line", list(col = NA, lty = 1, lwd = 1))
wireframe(output$z.grid, row.values = output$x.grid, column.values = output$y.grid, frame=FALSE, aspect = c(1,1), zlim = c(0,1), shade = TRUE,
xlab = list("Information indices", rot = 32,cex=2), ylab = list("2D descriptors", rot = -41, cex=2), zlab = list("Score", rot = 93,cex=2), scales = list(x = list(at=seq(1,4,0.5), labels=seq(1,4,0.5)), arrows = FALSE, col = 'black', font = 3, tck = 1), drape = TRUE, col.regions = colorRampPalette(c("dodgerblue4","white","firebrick4"))(100), col = "transparent", colorkey = FALSE)
dev.off()


## Figure 3

A <- output$z.grid
quartiles.V2 <- round(quantile(X[,2], probs = c(0,0.25,0.5,0.75,1)),1)
col.index <- sapply(quartiles.V2, function(q){which.min(abs(output$y.grid-q))})

c1 <- rowMeans(A[,col.index[1]:col.index[2]])
c2 <- rowMeans(A[,(col.index[2]+1):col.index[3]])
c3 <- rowMeans(A[,(col.index[3]+1):col.index[4]])
c4 <- rowMeans(A[,(col.index[4]+1):col.index[5]])

pdf("projections_mod.pdf", height = 8, width = 10)
par(mfrow=c(2,2), mar=c(5,5,4,1))
plot(output$x.grid, c1, lwd = 5, col = "blue", type = "l", ylim = c(0,1), cex.axis = 1.5, cex.lab = 1.5, xlab = "Information indices", ylab = "Score", main = "2D descriptors [0.0-0.2]", cex.main = 2)
par(mar=c(5,5,4,1))
plot(output$x.grid, c2, lwd = 5, col = "blue", type = "l", ylim = c(0,1), cex.axis = 1.5, cex.lab = 1.5, xlab = "Information indices", ylab = "Score", main = "2D descriptors (0.2-0.6]", cex.main = 2)
par(mar=c(5,5,4,1))
plot(output$x.grid, c3, lwd = 5, col = "blue", type = "l", ylim = c(0,1), cex.axis = 1.5, cex.lab = 1.5, xlab = "Information indices", ylab = "Score", main = "2D descriptors (0.6-0.9]", cex.main = 2)
par(mar=c(5,5,4,1))
plot(output$x.grid, c4, lwd = 5, col = "blue", type = "l", ylim = c(0,1), cex.axis = 1.5, cex.lab = 1.5, xlab = "Information indices", ylab = "Score", main = "2D descriptors (0.9-2.0]", cex.main = 2)
dev.off()


## Figure 4

pdf("ROCcurves_mod.pdf", height = 6.5, width = 13)
par(mfrow = c(1,2), mar = c(5,5,4,1))
hist(T.orig[D==0], col = adjustcolor("blue",0.4), lwd = 5, ylab = "Density", xlab = "Score", cex.lab = 1.5, cex.axis = 1.5, xlim = c(0,1), main=" ", border = "white")
hist(T.orig[D==1], col = adjustcolor("red",0.2), lwd = 5, add = TRUE, border = "white")

roc1 <- gROC(X[,1], D)
roc2 <-  gROC(X[,2], D)
roc3  <- gROC(T.orig, D)
model <- glm(D ~ X[,1] + X[,2], family = "binomial")
roc4 <- gROC(predict(model), D)

plot(roc1, cex.lab = 1.5, cex.axis = 1.5, main = " ", frame = FALSE, xlab = "1-Specificity", ylab = "Sensitivity", lwd = 1)
lines(c(0,roc2$t,1), c(0,roc2$roc,1), lty = 2)
lines(c(0,roc3$t,1), c(0,roc3$roc,1), lwd = 5)
lines(c(0,roc4$t,1), c(0,roc4$roc,1), lwd = 5, col = 'gray')

legend(x = 0.4, y = 0.35, c("Information indices","2D descriptors","Optimal score","Logistic regression"), lwd = c(1,1,5,5), lty = c(1,2,1,1), col = c('black','black','black','gray'), cex = 1.25, bty = "n")
dev.off()

## AUCs and 95% CI for the four ROC curves considered

boot.auc <- function(X, D, B = 5000){
	sapply(1:B, function(b){
		set.seed(b)
		boot.ind <- sample(1:length(X), replace=TRUE)
		gROC(X[boot.ind], D[boot.ind])$auc
	})
}

boot.auc1 <- boot.auc(X[,1], D)
boot.auc2 <- boot.auc(X[,2], D)
boot.auc3 <- boot.auc(T.orig, D)
boot.auc4 <- boot.auc(predict(model), D)

AUC.matrix <- rbind(round(c(roc1$auc, mean(boot.auc1), quantile(boot.auc1,c(0.025,0.975))),2),
round(c(roc2$auc, mean(boot.auc2), quantile(boot.auc2,c(0.025,0.975))),2),
round(c(roc3$auc, mean(boot.auc3), quantile(boot.auc3,c(0.025,0.975))),2),
round(c(roc4$auc, mean(boot.auc4), quantile(boot.auc4,c(0.025,0.975))),2))
rownames(AUC.matrix) <- c("InforInd", "2Ddescr", "OptScore", "LogitReg")
colnames(AUC.matrix) <- c("crude", "boot.mean", "2.5%", "97.5%")
AUC.matrix


	
#### Other examples

output2 <- optimalT(X, D)
output3 <- optimalT(X, D, H.method = "Hscv", K = 2, add.densityContour = FALSE, removeNA= FALSE, X1.lim = c(1,4.5), X2.lim = c(0,2), levels.method = "fpr")
output4 <- optimalT(X, D, H.method = "Hscv.diag", add.densityContour = FALSE, removeNA= FALSE, X1.lim = c(1,4.5), X2.lim = c(0,2), levels.method = "pretty", figures = c("B","C"))
