# Supplementary material for: Optimal classification scores based on multivariate marker transformations
Source: Springer Nature journal article supplement (doi:10.1007/s10182-020-00388-z), 2021-01-03
Supplement: MOESM2 [file 10182_2020_388_MOESM2_ESM.pdf]

# Online supplementary material to: Optimal classification scores based on multivariate marker transformations

Pablo Martínez-Cambor<sup>1\*</sup>, Sonia Pérez-Fernández<sup>2</sup>, Susana Díaz-Coto<sup>2</sup>

<sup>1</sup> Department of Biomedical Data Science, Geisel School of Medicine at Dartmouth, NH, USA

<sup>2</sup> Department of Statistics, Oviedo University, Asturias, Spain

As supplementary material of this paper we provide the R code used for computing plots and models reported herein. Main provided function, `optimalT`, incorporates a general  $k$ -fold cross-validation procedure for controlling the potential overfitting. R packages `nsROC` (developed by Pérez-Fernández et al. [2]) and `ks` (developed by Duong [1]) are required. The used dataset is freely available at <http://archive.ics.uci.edu/ml/datasets/QSAR+fish+toxicity#>. Results of additional simulations are provided in Tables S1, S2 and S3.

## R code: description of function `optimalT`

```
optimalT <- function(X, D, H.method = c("Hbcv", "Hscv", "Hpi", "Hns", "Hlscv",  
    "Hbcv.diag", "Hscv.diag", "Hpi.diag", "Hlscv.diag"), K = 1,  
    add.densityContour = TRUE, removeNA = FALSE, X1.lim =  
    NULL, X2.lim = NULL, levels.method = c("fpr", "pretty"),  
    figures = c("A", "B", "C"), new.window = TRUE, seed = 623)
```

```
## Input parameters:
```

```
# X: marker data (n x 2 matrix)
```

```
# D: response (vector of length n)
```

```
# H.method: method for computing the bandwidth among those proposed by
```

---

\*Pablo Martínez-Cambor. 7 Lebanon Street, Suite 309, Hinman Box 7261, Hanover, NH 03755, USA.  
E-mail: [Pablo.Martinez.Cambor@Dartmouth.edu](mailto:Pablo.Martinez.Cambor@Dartmouth.edu)

```

Duong (2007) ("Hbcv" by default, which is a biased cross validation estimate)
# K: number of folds considered for cross-validation. If K = 1 (default),
optimal transformation is estimated
# add.densityContour: TRUE if density contours of the bivariate density
estimates for both populations should be shown over the optimal
transformation contour plot
# removeNA: TRUE if the region displayed should be adjusted removing
NA-values in the optimal transformation (f+g estimate is zero)
# X1.lim, X2.lim: limits for the region displayed (vectors of length 2)
# levels.method: "fpr" if the optimal transformation contour levels
displayed correspond to the sequence 0:0.1:1 of false-positive rates
for the transformation; "pretty" if the default by filled.contour should
be considered
# figures: vector containing "A", "B" and/or "C" indicating which plots
should be displayed:
  # "A": contour plot for the bivariate kernel density estimate for
positive (red) and negative (blue) populations
  # "B": contour plot for the optimal score estimate
  # "C": ROC curve estimate
# new.window: TRUE if new windows should be opened for each figure displayed
# seed: seed used for grouping in K-fold CV

## Output parameters:
# X: marker data
# D: response
# tX: optimal transformation estimate (score) for X
# auc: Area Under the ROC Curve for the score
# x.grid, y.grid: grid used for each component of the bivariate marker
# z.grid: matrix containing the values of the score over the grid
x.grid * y.grid
# tX.CV: if K>1, optimal transformation estimate (score) for X resulting
from the k-fold cross validation performed

```

# auc.CV: Area Under the ROC Curve for the score tX.CV

## Simulation study: additional tables

Table S1: Means for the integrate absolute error (Integ. absolute error) between the real ROC curve,  $\mathcal{R}_T(\cdot)$ , and its estimation,  $\hat{\mathcal{R}}_{\hat{T}_N}(\cdot)$  ( $\int_0^1 |\hat{\mathcal{R}}_{\hat{T}_N}(t) - \mathcal{R}_T(t)| dt$ ) and for the AUC from 2,000 Monte Carlo simulations for the six considered models **without using any cross-validation** procedure. Considered bandwidths were smooth cross-validation (SCV), plug-in (PI), normal scale (NS) and biased cross-validation (BCV). RL stands for model based on standard binary logistic regression.

| $n$              | $m$ | $\mathcal{A}$ | AUC          |       |       |              |              | Integ. absolute error |       |       |              |              |
|------------------|-----|---------------|--------------|-------|-------|--------------|--------------|-----------------------|-------|-------|--------------|--------------|
|                  |     |               | SCV          | PI    | NS    | BCV          | RL           | SCV                   | PI    | NS    | BCV          | RL           |
| <b>Model 0</b>   |     |               |              |       |       |              |              |                       |       |       |              |              |
| 400              | 400 | 0.50          | 0.637        | 0.647 | 0.648 | 0.637        | <b>0.526</b> | 0.138                 | 0.148 | 0.149 | 0.139        | <b>0.030</b> |
|                  | 600 | 0.50          | 0.628        | 0.637 | 0.638 | 0.628        | <b>0.523</b> | 0.129                 | 0.138 | 0.139 | 0.129        | <b>0.026</b> |
| <b>Model I</b>   |     |               |              |       |       |              |              |                       |       |       |              |              |
| 400              | 400 | 0.70          | <b>0.729</b> | 0.733 | 0.733 | <b>0.729</b> | 0.526        | <b>0.031</b>          | 0.034 | 0.034 | <b>0.031</b> | 0.174        |
|                  | 600 | 0.70          | 0.725        | 0.729 | 0.729 | <b>0.724</b> | 0.522        | 0.027                 | 0.030 | 0.030 | <b>0.026</b> | 0.178        |
| 400              | 400 | 0.80          | 0.818        | 0.820 | 0.820 | <b>0.815</b> | 0.526        | 0.020                 | 0.022 | 0.022 | <b>0.019</b> | 0.276        |
|                  | 600 | 0.80          | 0.816        | 0.818 | 0.818 | <b>0.812</b> | 0.522        | 0.018                 | 0.019 | 0.019 | <b>0.016</b> | 0.280        |
| <b>Model II</b>  |     |               |              |       |       |              |              |                       |       |       |              |              |
| 400              | 400 | 0.75          | <b>0.768</b> | 0.771 | 0.771 | <b>0.768</b> | 0.526        | <b>0.025</b>          | 0.027 | 0.027 | <b>0.025</b> | 0.223        |
|                  | 600 | 0.75          | 0.764        | 0.766 | 0.766 | <b>0.763</b> | 0.523        | 0.022                 | 0.023 | 0.023 | <b>0.022</b> | 0.227        |
| 400              | 400 | 0.80          | 0.814        | 0.816 | 0.816 | <b>0.805</b> | 0.526        | 0.022                 | 0.023 | 0.023 | <b>0.018</b> | 0.272        |
|                  | 600 | 0.80          | 0.811        | 0.812 | 0.812 | <b>0.800</b> | 0.522        | 0.019                 | 0.020 | 0.020 | <b>0.017</b> | 0.277        |
| <b>Model III</b> |     |               |              |       |       |              |              |                       |       |       |              |              |
| 400              | 400 | 0.70          | 0.727        | 0.731 | 0.731 | 0.726        | <b>0.691</b> | 0.033                 | 0.036 | 0.036 | 0.032        | <b>0.022</b> |
|                  | 600 | 0.70          | 0.725        | 0.729 | 0.729 | 0.724        | <b>0.693</b> | 0.031                 | 0.034 | 0.034 | 0.030        | <b>0.020</b> |
| 400              | 400 | 0.80          | 0.815        | 0.818 | 0.818 | 0.815        | <b>0.797</b> | 0.023                 | 0.024 | 0.024 | 0.022        | <b>0.019</b> |
|                  | 600 | 0.80          | 0.816        | 0.818 | 0.818 | 0.815        | <b>0.798</b> | 0.022                 | 0.023 | 0.023 | 0.021        | <b>0.017</b> |
| <b>Model IV</b>  |     |               |              |       |       |              |              |                       |       |       |              |              |
| 400              | 400 | 0.75          | 0.776        | 0.780 | 0.780 | <b>0.775</b> | 0.722        | 0.031                 | 0.034 | 0.034 | <b>0.030</b> | 0.034        |
|                  | 600 | 0.75          | 0.773        | 0.776 | 0.777 | <b>0.772</b> | 0.724        | 0.028                 | 0.030 | 0.030 | <b>0.027</b> | 0.031        |
| 400              | 400 | 0.85          | 0.865        | 0.867 | 0.867 | 0.864        | <b>0.843</b> | 0.022                 | 0.024 | 0.024 | 0.022        | <b>0.018</b> |
|                  | 600 | 0.85          | 0.865        | 0.867 | 0.867 | 0.864        | <b>0.845</b> | 0.021                 | 0.023 | 0.023 | 0.021        | <b>0.017</b> |
| <b>Model V</b>   |     |               |              |       |       |              |              |                       |       |       |              |              |
| 400              | 400 | 0.75          | 0.770        | 0.775 | 0.761 | <b>0.752</b> | 0.641        | 0.025                 | 0.030 | 0.020 | <b>0.017</b> | 0.108        |
|                  | 600 | 0.75          | 0.766        | 0.771 | 0.756 | <b>0.748</b> | 0.640        | 0.022                 | 0.026 | 0.017 | <b>0.016</b> | 0.109        |
| 400              | 400 | 0.85          | 0.866        | 0.869 | 0.861 | <b>0.856</b> | 0.815        | 0.023                 | 0.025 | 0.019 | <b>0.017</b> | 0.036        |
|                  | 600 | 0.85          | 0.865        | 0.868 | 0.859 | <b>0.855</b> | 0.815        | 0.021                 | 0.023 | 0.018 | <b>0.016</b> | 0.035        |
| <b>Model VI</b>  |     |               |              |       |       |              |              |                       |       |       |              |              |
| 400              | 400 | 0.80          | 0.816        | 0.819 | 0.816 | 0.812        | <b>0.789</b> | 0.022                 | 0.023 | 0.022 | <b>0.020</b> | <b>0.020</b> |
|                  | 600 | 0.80          | 0.815        | 0.818 | 0.815 | 0.812        | <b>0.791</b> | 0.020                 | 0.022 | 0.020 | <b>0.019</b> | <b>0.019</b> |
| 400              | 400 | 0.85          | 0.861        | 0.863 | 0.861 | 0.858        | <b>0.843</b> | 0.018                 | 0.020 | 0.018 | 0.017        | <b>0.016</b> |
|                  | 600 | 0.85          | 0.861        | 0.863 | 0.861 | 0.858        | <b>0.845</b> | 0.017                 | 0.018 | 0.017 | 0.016        | <b>0.015</b> |

Table S2: Means for the integrate absolute error (Integ. absolute error) between the real ROC curve,  $\mathcal{R}_T(\cdot)$ , and its estimation,  $\hat{\mathcal{R}}_{\hat{T}_N}(\cdot)$  ( $\int_0^1 |\hat{\mathcal{R}}_{\hat{T}_N}(t) - \mathcal{R}_T(t)| dt$ ) and for the AUC from 2,000 Monte Carlo simulations for the six considered models **by using 2-fold cross-validation** procedure. **Small sample sizes,  $n$  and  $m$  for positive and negative groups respectively, were considered.**  $\mathcal{A}$  is the real AUC. Considered bandwidths were smooth cross-validation (SCV), plug-in (PI), normal scale (NS) and biased cross-validation (BCV). RL stands for model based on standard binary logistic regression.

| $n$              | $m$ | $\mathcal{A}$ | AUC   |       |       |       |       | Integ. absolute error |       |       |       |       |
|------------------|-----|---------------|-------|-------|-------|-------|-------|-----------------------|-------|-------|-------|-------|
|                  |     |               | SCV   | PI    | NS    | BCV   | RL    | SCV                   | PI    | NS    | BCV   | RL    |
| <b>Model 0</b>   |     |               |       |       |       |       |       |                       |       |       |       |       |
| 100              | 100 | 0.50          | 0.496 | 0.497 | 0.497 | 0.497 | 0.484 | 0.051                 | 0.052 | 0.053 | 0.052 | 0.050 |
|                  | 200 | 0.50          | 0.496 | 0.495 | 0.495 | 0.495 | 0.478 | 0.046                 | 0.046 | 0.046 | 0.046 | 0.046 |
| <b>Model I</b>   |     |               |       |       |       |       |       |                       |       |       |       |       |
| 100              | 100 | 0.70          | 0.656 | 0.651 | 0.654 | 0.632 | 0.481 | 0.061                 | 0.064 | 0.063 | 0.077 | 0.216 |
|                  | 200 | 0.70          | 0.662 | 0.658 | 0.660 | 0.642 | 0.484 | 0.053                 | 0.055 | 0.054 | 0.067 | 0.216 |
| 100              | 100 | 0.80          | 0.774 | 0.771 | 0.773 | 0.739 | 0.478 | 0.044                 | 0.046 | 0.045 | 0.067 | 0.320 |
|                  | 200 | 0.80          | 0.777 | 0.774 | 0.776 | 0.747 | 0.481 | 0.037                 | 0.039 | 0.038 | 0.059 | 0.319 |
| <b>Model II</b>  |     |               |       |       |       |       |       |                       |       |       |       |       |
| 100              | 100 | 0.75          | 0.713 | 0.709 | 0.713 | 0.716 | 0.482 | 0.053                 | 0.056 | 0.054 | 0.052 | 0.264 |
|                  | 200 | 0.75          | 0.727 | 0.722 | 0.724 | 0.728 | 0.483 | 0.043                 | 0.046 | 0.044 | 0.042 | 0.265 |
| 100              | 100 | 0.80          | 0.772 | 0.768 | 0.771 | 0.732 | 0.480 | 0.043                 | 0.046 | 0.044 | 0.072 | 0.315 |
|                  | 200 | 0.80          | 0.777 | 0.774 | 0.776 | 0.736 | 0.486 | 0.040                 | 0.042 | 0.040 | 0.067 | 0.311 |
| <b>Model III</b> |     |               |       |       |       |       |       |                       |       |       |       |       |
| 100              | 100 | 0.70          | 0.650 | 0.645 | 0.647 | 0.651 | 0.664 | 0.064                 | 0.068 | 0.067 | 0.064 | 0.053 |
|                  | 200 | 0.70          | 0.656 | 0.652 | 0.654 | 0.658 | 0.672 | 0.057                 | 0.060 | 0.058 | 0.056 | 0.043 |
| 100              | 100 | 0.80          | 0.767 | 0.762 | 0.765 | 0.769 | 0.779 | 0.051                 | 0.054 | 0.052 | 0.049 | 0.042 |
|                  | 200 | 0.80          | 0.772 | 0.768 | 0.770 | 0.774 | 0.785 | 0.043                 | 0.046 | 0.044 | 0.042 | 0.034 |
| <b>Model IV</b>  |     |               |       |       |       |       |       |                       |       |       |       |       |
| 100              | 100 | 0.75          | 0.712 | 0.707 | 0.709 | 0.715 | 0.703 | 0.055                 | 0.058 | 0.056 | 0.053 | 0.057 |
|                  | 200 | 0.75          | 0.721 | 0.716 | 0.718 | 0.722 | 0.707 | 0.046                 | 0.049 | 0.048 | 0.046 | 0.051 |
| 100              | 100 | 0.85          | 0.824 | 0.821 | 0.822 | 0.827 | 0.831 | 0.043                 | 0.045 | 0.045 | 0.042 | 0.038 |
|                  | 200 | 0.85          | 0.830 | 0.827 | 0.828 | 0.832 | 0.834 | 0.037                 | 0.039 | 0.038 | 0.036 | 0.033 |
| <b>Model V</b>   |     |               |       |       |       |       |       |                       |       |       |       |       |
| 100              | 100 | 0.75          | 0.677 | 0.674 | 0.674 | 0.671 | 0.601 | 0.076                 | 0.079 | 0.079 | 0.081 | 0.145 |
|                  | 200 | 0.75          | 0.678 | 0.677 | 0.676 | 0.672 | 0.610 | 0.076                 | 0.076 | 0.077 | 0.080 | 0.138 |
| 100              | 100 | 0.85          | 0.807 | 0.804 | 0.806 | 0.809 | 0.799 | 0.052                 | 0.054 | 0.052 | 0.050 | 0.055 |
|                  | 200 | 0.85          | 0.808 | 0.805 | 0.808 | 0.809 | 0.802 | 0.049                 | 0.052 | 0.049 | 0.047 | 0.051 |
| <b>Model VI</b>  |     |               |       |       |       |       |       |                       |       |       |       |       |
| 100              | 100 | 0.80          | 0.762 | 0.759 | 0.761 | 0.766 | 0.770 | 0.051                 | 0.054 | 0.051 | 0.048 | 0.044 |
|                  | 200 | 0.80          | 0.772 | 0.769 | 0.771 | 0.775 | 0.779 | 0.042                 | 0.045 | 0.043 | 0.041 | 0.036 |
| 100              | 100 | 0.85          | 0.817 | 0.814 | 0.816 | 0.821 | 0.828 | 0.044                 | 0.046 | 0.044 | 0.041 | 0.037 |
|                  | 200 | 0.85          | 0.827 | 0.825 | 0.827 | 0.830 | 0.835 | 0.036                 | 0.038 | 0.036 | 0.034 | 0.030 |

Table S3: Means for the integrate absolute error (Integ. absolute error) between the real ROC curve,  $\mathcal{R}_T(\cdot)$ , and its estimation,  $\hat{\mathcal{R}}_{\hat{T}_N}(\cdot)$  ( $\int_0^1 |\hat{\mathcal{R}}_{\hat{T}_N}(t) - \mathcal{R}_T(t)| dt$ ) and for the AUC from 2,000 Monte Carlo simulations for the six considered models **without using any cross-validation** procedure. **Small sample sizes,  $n$  and  $m$  for positive and negative groups respectively, were considered.**  $\mathcal{A}$  is the real AUC. Considered bandwidths were smooth cross-validation (SCV), plug-in (PI), normal scale (NS) and biased cross-validation (BCV). RL stands for model based on standard binary logistic regression.

| $n$              | $m$ | $\mathcal{A}$ | AUC   |       |       |       |       | Integ. absolute error |       |       |       |       |
|------------------|-----|---------------|-------|-------|-------|-------|-------|-----------------------|-------|-------|-------|-------|
|                  |     |               | SCV   | PI    | NS    | BCV   | RL    | SCV                   | PI    | NS    | BCV   | RL    |
| <b>Model 0</b>   |     |               |       |       |       |       |       |                       |       |       |       |       |
| 100              | 100 | 0.50          | 0.696 | 0.720 | 0.719 | 0.704 | 0.551 | 0.201                 | 0.225 | 0.224 | 0.209 | 0.060 |
|                  | 200 | 0.50          | 0.678 | 0.699 | 0.699 | 0.685 | 0.540 | 0.180                 | 0.202 | 0.201 | 0.187 | 0.048 |
| <b>Model I</b>   |     |               |       |       |       |       |       |                       |       |       |       |       |
| 100              | 100 | 0.70          | 0.763 | 0.777 | 0.775 | 0.767 | 0.550 | 0.068                 | 0.081 | 0.079 | 0.072 | 0.147 |
|                  | 200 | 0.70          | 0.750 | 0.762 | 0.761 | 0.752 | 0.541 | 0.054                 | 0.064 | 0.063 | 0.055 | 0.159 |
| 100              | 100 | 0.80          | 0.836 | 0.845 | 0.843 | 0.835 | 0.550 | 0.043                 | 0.049 | 0.048 | 0.042 | 0.248 |
|                  | 200 | 0.80          | 0.829 | 0.836 | 0.835 | 0.825 | 0.540 | 0.035                 | 0.039 | 0.039 | 0.032 | 0.260 |
| <b>Model II</b>  |     |               |       |       |       |       |       |                       |       |       |       |       |
| 100              | 100 | 0.75          | 0.795 | 0.806 | 0.804 | 0.796 | 0.551 | 0.055                 | 0.063 | 0.062 | 0.056 | 0.196 |
|                  | 200 | 0.75          | 0.784 | 0.792 | 0.791 | 0.785 | 0.543 | 0.045                 | 0.050 | 0.049 | 0.045 | 0.205 |
| 100              | 100 | 0.80          | 0.831 | 0.839 | 0.838 | 0.817 | 0.550 | 0.042                 | 0.048 | 0.047 | 0.034 | 0.245 |
|                  | 200 | 0.80          | 0.825 | 0.831 | 0.830 | 0.806 | 0.542 | 0.037                 | 0.040 | 0.040 | 0.030 | 0.255 |
| <b>Model III</b> |     |               |       |       |       |       |       |                       |       |       |       |       |
| 100              | 100 | 0.70          | 0.759 | 0.774 | 0.772 | 0.761 | 0.695 | 0.068                 | 0.081 | 0.079 | 0.070 | 0.040 |
|                  | 200 | 0.70          | 0.749 | 0.761 | 0.760 | 0.750 | 0.693 | 0.057                 | 0.067 | 0.066 | 0.057 | 0.034 |
| 100              | 100 | 0.80          | 0.833 | 0.841 | 0.840 | 0.833 | 0.799 | 0.046                 | 0.052 | 0.050 | 0.046 | 0.036 |
|                  | 200 | 0.80          | 0.828 | 0.835 | 0.834 | 0.828 | 0.798 | 0.038                 | 0.042 | 0.042 | 0.038 | 0.030 |
| <b>Model IV</b>  |     |               |       |       |       |       |       |                       |       |       |       |       |
| 100              | 100 | 0.75          | 0.801 | 0.813 | 0.812 | 0.803 | 0.725 | 0.060                 | 0.070 | 0.069 | 0.061 | 0.045 |
|                  | 200 | 0.75          | 0.793 | 0.802 | 0.801 | 0.793 | 0.724 | 0.050                 | 0.057 | 0.057 | 0.051 | 0.042 |
| 100              | 100 | 0.85          | 0.879 | 0.885 | 0.885 | 0.879 | 0.845 | 0.041                 | 0.046 | 0.045 | 0.042 | 0.033 |
|                  | 200 | 0.85          | 0.875 | 0.880 | 0.879 | 0.875 | 0.844 | 0.036                 | 0.039 | 0.039 | 0.036 | 0.030 |
| <b>Model V</b>   |     |               |       |       |       |       |       |                       |       |       |       |       |
| 100              | 100 | 0.75          | 0.794 | 0.808 | 0.792 | 0.779 | 0.647 | 0.055                 | 0.066 | 0.052 | 0.043 | 0.099 |
|                  | 200 | 0.75          | 0.784 | 0.796 | 0.779 | 0.767 | 0.642 | 0.043                 | 0.052 | 0.039 | 0.032 | 0.106 |
| 100              | 100 | 0.85          | 0.882 | 0.890 | 0.881 | 0.873 | 0.817 | 0.044                 | 0.050 | 0.042 | 0.038 | 0.043 |
|                  | 200 | 0.85          | 0.876 | 0.883 | 0.874 | 0.867 | 0.813 | 0.038                 | 0.042 | 0.035 | 0.031 | 0.043 |
| <b>Model VI</b>  |     |               |       |       |       |       |       |                       |       |       |       |       |
| 100              | 100 | 0.80          | 0.831 | 0.841 | 0.836 | 0.828 | 0.788 | 0.041                 | 0.047 | 0.043 | 0.039 | 0.035 |
|                  | 200 | 0.80          | 0.825 | 0.833 | 0.829 | 0.823 | 0.791 | 0.036                 | 0.040 | 0.038 | 0.034 | 0.031 |
| 100              | 100 | 0.85          | 0.871 | 0.879 | 0.875 | 0.869 | 0.843 | 0.034                 | 0.038 | 0.035 | 0.032 | 0.030 |
|                  | 200 | 0.85          | 0.868 | 0.874 | 0.871 | 0.866 | 0.845 | 0.031                 | 0.033 | 0.032 | 0.030 | 0.027 |

## Acknowledgment

This work is supported by the Grants MTM2015-63971-P and MTM2014-55966-P from the Spanish Ministerio of Economía y Competitividad; FC-GRUPIN-IDI/2018/000132 and Severo Ochoa Grant BP16118 (this one for S. Pérez-Fernández) from the Asturias Government (Gobierno del Principado de Asturias).

## References

- [1] Duong, T. (2019). *ks: Kernel Smoothing*. R package version 1.11.5.
- [2] Pérez-Fernández, S., P. Martínez-Camblor, P. Filzmoser, and N. Corral (2018). nsROC: An R package for Non-Standard ROC Curve Analysis. *The R Journal* 10(2), 55–77.
